# Supplementary material for: An In Vitro Study of Saffron Carotenoids: The Effect of Crocin Extracts and Dimethylcrocetin on Cancer Cell Lines
Source: MDPI journal article supplement (doi:10.3390/antiox11061074), 2022-05-28
Supplement: s1 [file s1]

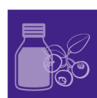

## Article

# An In Vitro Study of Saffron Carotenoids: The Effect of Crocin Extracts and Dimethylcrocetin on Cancer Cell Lines

Kyriaki Hatziagapiou <sup>1,2,\*</sup>, Olti Nikola <sup>1,†</sup>, Sofia Marka <sup>3</sup>, Eleni Koniari <sup>4</sup>, Eleni Kakouri <sup>5</sup>, Maria-Eleftheria Zografaki <sup>6</sup>, Sophie S. Mavrikou <sup>3</sup>, Charalabos Kanakis <sup>5</sup>, Emmanouil Flemetakis <sup>6</sup>, George P. Chrousos <sup>4</sup>, Spyridon Kintzios <sup>3</sup>, George I. Lambrou <sup>1,\*</sup>, Christina Kanaka-Gantenbein <sup>1</sup> and Petros A. Tarantilis <sup>5</sup>

<sup>1</sup> Choremeio Research Laboratory, First Department of Pediatrics, National and Kapodistrian University of Athens, Thivon & Levadeias 8, 11527 Athens, Greece; khatziag@med.uoa.gr; onikola@med.uoa.gr (O.N.); ckanaka@med.uoa.gr (C.K.-G.)

<sup>2</sup> Physiotherapy Department, Faculty of Health and Care Sciences, State University of West Attica, Agiou Spiridonos 28, Egaleo, 12243 Athens, Greece; khatziag@med.uoa.gr

<sup>3</sup> Laboratory of Cell Technology, Department of Biotechnology, Agricultural University of Athens, EU-CONEXUS European University, 11855 Athens, Greece; smarka@aua.gr (S.M.); sophie\_mav@aua.gr (S.S.M.); skin@aua.gr (S.K.)

<sup>4</sup> University Research Institute of Maternal and Child Health & Precision Medicine, UNESCO Chair on Adolescent Health Care, National and Kapodistrian University of Athens, Thivon & Levadeias 8, 11527 Athens, Greece; hkoniari@med.uoa.gr (E.K.); chrousge@med.uoa.gr (G.P.C.)

<sup>5</sup> Laboratory of Chemistry, Department of Food Science & Human Nutrition, School of Food Biotechnology and Development, Agricultural University of Athens, EU-CONEXUS European University, 11855 Athens, Greece; elenikakouri@aua.gr (E.K.); chkanakis@aua.gr (C.K.); ptara@aua.gr (P.A.T.)

<sup>6</sup> Laboratory of Molecular Biology, Department of Biotechnology, Agricultural University of Athens, EU-CONEXUS European University, 11855 Athens, Greece; mzografaki@aua.gr (M.-E.Z.); mflem@aua.gr (E.F.)

\* Correspondence: khatziag@med.uoa.gr (K.H.); glamprou@med.uoa.gr (G.I.L.)

† These authors contributed equally to this work and should be considered first authors.

| SOURCE | TERM_NAME                                                                                                    | ADJ.<br>P_VALUE | INTERSECTIONS              |
|--------|--------------------------------------------------------------------------------------------------------------|-----------------|----------------------------|
| GO:MF  | BH3 domain binding                                                                                           | 0.000200168     | BAX, BCL2                  |
| GO:MF  | BH domain binding                                                                                            | 0.000733425     | BAX, BCL2                  |
| GO:MF  | death domain binding                                                                                         | 0.000733425     | BAX, BCL2                  |
| GO: BP | positive regulation of intrinsic apoptotic signaling pathway                                                 | 1.89054E-06     | BAX, BID, BCL2, SOD1       |
| GO: BP | regulation of mitochondrial membrane potential                                                               | 4.11443E-06     | BAX, BID, BCL2, SOD1       |
| GO: BP | positive regulation of apoptotic signaling pathway                                                           | 3.8264E-05      | BAX, BID, BCL2, SOD1       |
| GO: BP | protein insertion into mitochondrial membrane involved in apoptotic signaling pathway                        | 8.32542E-05     | BAX, BID, BCL2             |
| GO: BP | regulation of intrinsic apoptotic signaling pathway                                                          | 0.000104947     | BAX, BID, BCL2, SOD1       |
| GO: BP | positive regulation of mitochondrial outer membrane permeabilization involved in apoptotic signaling pathway | 0.000146303     | BAX, BID, BCL2             |
| GO: BP | regulation of nitrogen utilization                                                                           | 0.000279587     | BAX, BCL2                  |
| GO: BP | regulation of mitochondrial outer membrane permeabilization involved in apoptotic signaling pathway          | 0.000310662     | BAX, BID, BCL2             |
| GO: BP | protein insertion into mitochondrial membrane                                                                | 0.00037691      | BAX, BID, BCL2             |
| GO: BP | positive regulation of cell death                                                                            | 0.000471175     | BAX, BID, BCL2, MYCN, SOD1 |
| GO: BP | establishment of protein localization to mitochondrial membrane                                              | 0.000507114     | BAX, BID, BCL2             |
| GO: BP | ovarian follicle development                                                                                 | 0.000536304     | BAX, BCL2, SOD1            |
| GO: BP | neuron apoptotic process                                                                                     | 0.00053806      | BAX, BID, BCL2, SOD1       |
| GO: BP | nitrogen utilization                                                                                         | 0.000559091     | BAX, BCL2                  |
| GO: BP | response to toxic substance                                                                                  | 0.000564259     | BAX, BCL2, SOD1, GSTM1     |
| GO: BP | mitochondrial outer membrane permeabilization                                                                | 0.000597993     | BAX, BID, BCL2             |
| GO: BP | release of cytochrome c from mitochondria                                                                    | 0.000664228     | BAX, BID, BCL2             |
| GO: BP | positive regulation of mitochondrial membrane permeability involved in apoptotic process                     | 0.000810977     | BAX, BID, BCL2             |
| GO: BP | mitochondrial outer membrane permeabilization involved in programmed cell death                              | 0.000891809     | BAX, BID, BCL2             |
| GO: BP | positive regulation of mitochondrial membrane permeability                                                   | 0.000977827     | BAX, BID, BCL2             |
| GO: BP | intrinsic apoptotic signaling pathway                                                                        | 0.001054384     | BAX, BID, BCL2, SOD1       |
| GO: BP | regulation of mitochondrial membrane permeability involved in apoptotic process                              | 0.00106919      | BAX, BID, BCL2             |
| GO: BP | positive regulation of membrane permeability                                                                 | 0.001216602     | BAX, BID, BCL2             |
| GO: BP | retinal cell programmed cell death                                                                           | 0.001397316     | BAX, BCL2                  |
| GO: BP | response to axon injury                                                                                      | 0.001738502     | BAX, BCL2, SOD1            |
| GO: BP | regulation of mitochondrial membrane permeability                                                            | 0.001871725     | BAX, BID, BCL2             |
| GO: BP | extrinsic apoptotic signaling pathway via death domain receptors                                             | 0.002011561     | BAX, BID, BCL2             |
| GO: BP | positive regulation of mitochondrion organization                                                            | 0.00223406      | BAX, BID, BCL2             |
| GO: BP | regulation of apoptotic signaling pathway                                                                    | 0.002399642     | BAX, BID, BCL2, SOD1       |
| GO: BP | neuron death                                                                                                 | 0.002399642     | BAX, BID, BCL2, SOD1       |
| GO: BP | positive regulation of developmental pigmentation                                                            | 0.002607555     | BAX, BCL2                  |
| GO: BP | protein insertion into membrane                                                                              | 0.002998294     | BAX, BID, BCL2             |
| GO: BP | female gonad development                                                                                     | 0.002998294     | BAX, BCL2, SOD1            |
| GO: BP | regulation of membrane permeability                                                                          | 0.003092591     | BAX, BID, BCL2             |
| GO: BP | development of primary female sexual characteristics                                                         | 0.003489463     | BAX, BCL2, SOD1            |
| GO: BP | intrinsic apoptotic signaling pathway in response to DNA damage                                              | 0.003699981     | BAX, BID, BCL2             |
| GO:CC  | mitochondrial outer membrane                                                                                 | 0.003834007     | BAX, BID, BCL2             |
| GO:CC  | pore complex                                                                                                 | 0.004261987     | BAX, BCL2                  |
| GO:CC  | organelle outer membrane                                                                                     | 0.005407208     | BAX, BID, BCL2             |
| GO:CC  | outer membrane                                                                                               | 0.005548796     | BAX, BID, BCL2             |
| GO:CC  | mitochondrial envelope                                                                                       | 0.00694808      | BAX, BID, BCL2, SOD1       |
| KEGG   | Platinum drug resistance                                                                                     | 4.13249E-06     | BAX, BID, BCL2, GSTM1      |
| KEGG   | Apoptosis - multiple species                                                                                 | 5.34016E-05     | BAX, BID, BCL2             |
| KEGG   | p53 signaling pathway                                                                                        | 0.000661918     | BAX, BID, BCL2             |
| KEGG   | Amyotrophic lateral sclerosis                                                                                | 0.002693269     | BAX, BID, BCL2, SOD1       |
| KEGG   | Sphingolipid signaling pathway                                                                               | 0.002876347     | BAX, BID, BCL2             |

|       |                                                                               |             |                             |
|-------|-------------------------------------------------------------------------------|-------------|-----------------------------|
| KEGG  | <b>Apoptosis</b>                                                              | 0.004286524 | BAX, BID, BCL2              |
| KEGG  | Measles                                                                       | 0.004574794 | BAX, BID, BCL2              |
| KEGG  | Necroptosis                                                                   | 0.006827122 | BAX, BID, BCL2              |
| KEGG  | Hepatitis B                                                                   | 0.007217276 | BAX, BID, BCL2              |
| KEGG  | Pathways of neurodegeneration - multiple diseases                             | 0.007744505 | BAX, BID, BCL2, SOD1        |
| KEGG  | Tuberculosis                                                                  | 0.009076859 | BAX, BID, BCL2              |
| KEGG  | Pathways in cancer                                                            | 0.011794425 | BAX, BID, BCL2, GSTM1       |
| KEGG  | Epstein-Barr virus infection                                                  | 0.013086894 | BAX, BID, BCL2              |
| KEGG  | Human immunodeficiency virus 1 infection                                      | 0.015573539 | BAX, BID, BCL2              |
| KEGG  | Lipid and atherosclerosis                                                     | 0.016466087 | BAX, BID, BCL2              |
| REAC  | Activation, translocation and oligomerization of BAX                          | 3.15444E-05 | BAX, BID                    |
| REAC  | Intrinsic Pathway for Apoptosis                                               | 0.000195569 | BAX, BID, BCL2              |
| REAC  | BH3-only proteins associate with and inactivate anti-apoptotic BCL-2 members  | 0.001134101 | BID, BCL2                   |
| REAC  | Activation of BAD and translocation to mitochondria                           | 0.003304058 | BID, BCL2                   |
| REAC  | <b>TP53 Regulates Transcription of Genes Involved in Cytochrome C Release</b> | 0.00597314  | BAX, BID                    |
| REAC  | <b>Apoptosis</b>                                                              | 0.007504833 | BAX, BID, BCL2              |
| REAC  | <b>Programmed Cell Death</b>                                                  | 0.009161674 | BAX, BID, BCL2              |
| REAC  | Activation of BH3-only proteins                                               | 0.013649586 | BID, BCL2                   |
| REAC  | TP53 Regulates Transcription of Cell Death Genes                              | 0.029605634 | BAX, BID                    |
| WP    | Amyotrophic lateral sclerosis (ALS)                                           | 6.65E-07    | BAX, BID, BCL2, SOD1        |
| WP    | TP53 Network                                                                  | 2.59376E-05 | BAX, BID, BCL2              |
| WP    | Nanomaterial induced apoptosis                                                | 2.59376E-05 | BAX, BID, BCL2              |
| WP    | Regulation of Apoptosis by Parathyroid Hormone-related Protein                | 3.50177E-05 | BAX, BID, BCL2              |
| WP    | Host-pathogen interaction of human corona viruses - apoptosis                 | 3.50177E-05 | BAX, BID, BCL2              |
| WP    | Photodynamic therapy-induced AP-1 survival signaling.                         | 0.000469452 | BAX, BID, BCL2              |
| WP    | <b>Apoptosis</b>                                                              | 0.002282975 | BAX, BID, BCL2              |
| WP    | Viral Acute Myocarditis                                                       | 0.002363801 | BAX, BID, BCL2              |
| WP    | <b>Apoptosis Modulation and Signaling</b>                                     | 0.002888716 | BAX, BID, BCL2              |
| WP    | Small cell lung cancer                                                        | 0.003380728 | BAX, BID, BCL2              |
| WP    | Overview of nanoparticle effects                                              | 0.00734644  | BAX, BCL2                   |
| WP    | Unfolded protein response                                                     | 0.012861208 | BID, BCL2                   |
| WP    | Integrated Breast Cancer Pathway                                              | 0.01304607  | BAX, BID, BCL2              |
| WP    | Hepatitis B infection                                                         | 0.01304607  | BAX, BID, BCL2              |
| WP    | miRNA regulation of p53 pathway in prostate cancer                            | 0.022571838 | BAX, BID                    |
| WP    | Photodynamic therapy-induced HIF-1 survival signaling                         | 0.028431074 | BAX, BID                    |
| WP    | Integrated Cancer Pathway                                                     | 0.042143043 | BAX, BCL2                   |
| HPA   | spleen; cells in white pulp[β%¥Medium]                                        | 0.047615873 | BAX, BID, BCL2, SOD1, GSTM1 |
| CORUM | BAX homo-oligomer complex                                                     | 0.024838735 | BAX                         |
| CORUM | BAX homo-oligomer complex                                                     | 0.024838735 | BAX                         |
| CORUM | BCL2-CISD2 complex                                                            | 0.049670619 | BCL2                        |
| CORUM | <b>p53-BCL2 complex</b>                                                       | 0.049670619 | BCL2                        |
| CORUM | CALM1-FKBP38-BCL2 complex                                                     | 0.049670619 | BCL2                        |

**Table S1.** The detailed description of GO enrichment as derived from the gprofiler web-tool.
